# Supplementary material for: Excited state proton transfer in the triplet state of 8-hydroxy-5-nitroquinoline: a transient absorption and time-resolved resonance Raman spectroscopic study
Source: Royal Society of Chemistry journal article supplement (doi:10.1039/d2cp04315g), 2022-11-24

## Supporting Information

### **Excited state proton transfer in the triplet state of 8-hydroxy-5-nitroquinoline : A transient absorption and time-resolved resonance Raman spectroscopic study**

Ran Wang<sup>a</sup>, Fengjin Zhang<sup>a</sup>, Xinghang Pan<sup>a</sup>, Xuming Zheng<sup>a</sup>, Jiadan Xue<sup>a,d\*</sup>, Yong Du<sup>b\*</sup>, Binbin Xie<sup>c\*</sup>

<sup>a</sup>*Department of Chemistry, Zhejiang Sci-Tech University, Hangzhou, 310018, China*

<sup>b</sup>*Center for THz Research, China Jiliang University, Hangzhou, 310018, China*

<sup>c</sup>*Zhejiang Normal University, Hangzhou Institute of Advanced Studies, Hangzhou 310018, China*

<sup>d</sup>*Key Laboratory of Surface & Interface Science of Polymer Materials of Zhejiang Province, Zhejiang Sci-Tech University, Hangzhou, 310018, China*

\* Author to whom correspondence should be addressed.

E-mail: [jenniexue@zstu.edu.cn](mailto:jenniexue@zstu.edu.cn)

## Content

|                                                                                                                                                                                                                                                                                                                                                                                  |    |
|----------------------------------------------------------------------------------------------------------------------------------------------------------------------------------------------------------------------------------------------------------------------------------------------------------------------------------------------------------------------------------|----|
| <b>Fig.1S</b> (a) UV-Vis spectra of 8-hydroxy-5-nitroquinoline in acetonitrile:water=1:1(v/v) in the presence of various concentrations of perchloric acid. (b) Measurements of pKa for HO-QN-NO <sub>2</sub> in acetonitrile:water=1:1(v/v) solution.....                                                                                                                       | 3  |
| <b>Fig.2S</b> TA spectra recorded at 0 ns after 355 nm laser excitation of 5-nitroquinoline in acetonitrile under argon saturated conditions with 0.5 M HClO <sub>4</sub> and without acid present.....                                                                                                                                                                          | 3  |
| <b>Fig.3S</b> Plot of kinetics data at wavelengths 390–590 nm. The data were collected immediately after 355 nm laser excitation of 8-hydroxyquinoline in argon saturated acetonitrile.....                                                                                                                                                                                      | 4  |
| <b>Fig.5S</b> UV-Vis absorption spectra of 8-hydroxy-5-nitroquinoline in acetonitrile in the presence of various concentrations of (A) tetra-butylammonium hydroxide and (B) <i>t</i> -butylamine. ....                                                                                                                                                                          | 5  |
| <b>Fig.6S</b> Nanosecond TA spectra after excitation of 8-hydroxy-5-nitroquinoline under argon condition in acetonitrile solution containing (a) 3.79 mM TBA and (b) 5.68 mM TBA.....                                                                                                                                                                                            | 6  |
| <b>Fig.7S</b> Fitting mono-exponential functions to the kinetics of 8-hydroxy-5-nitroquinoline under argon condition at 400 nm obtained in acetonitrile containing various concentrations of TBA.....                                                                                                                                                                            | 7  |
| <b>Fig.8S</b> Nanosecond TA spectra and kinetic data at 630 nm obtained after excitation of 4-nitro-1-naphthol under argon condition in acetonitrile solution containing various concentrations of TBA. .                                                                                                                                                                        | 8  |
| <b>Fig.10S</b> (A) Nanosecond TA spectra recorded after excitation of 8-hydroxy-5-nitroquinoline under air condition in MeCN:H <sub>2</sub> O=9:1 (v/v). (B) A comparison of the TA spectrum recorded at 0 ns under air condition in MeCN:H <sub>2</sub> O=9:1 (v/v) to the difference spectrum by subtracting the scaled 500 ns spectrum from the 0 ns spectrum in graph A..... | 10 |
| <b>Table 1S</b> Tentative vibrational assignments for T <sub>1</sub> state of NO <sub>2</sub> -QN-O <sup>-</sup> in ACN.....                                                                                                                                                                                                                                                     | 11 |
| Ttransition state of transformation of NO <sub>2</sub> -QN-OH to NO <sub>2</sub> -QNH-O with the help of water in acetonitrile .....                                                                                                                                                                                                                                             | 12 |
| Ttransition state of transformation of NO <sub>2</sub> -QN-OH to NO <sub>2</sub> -QNH-O in acetontirile. ....                                                                                                                                                                                                                                                                    | 13 |

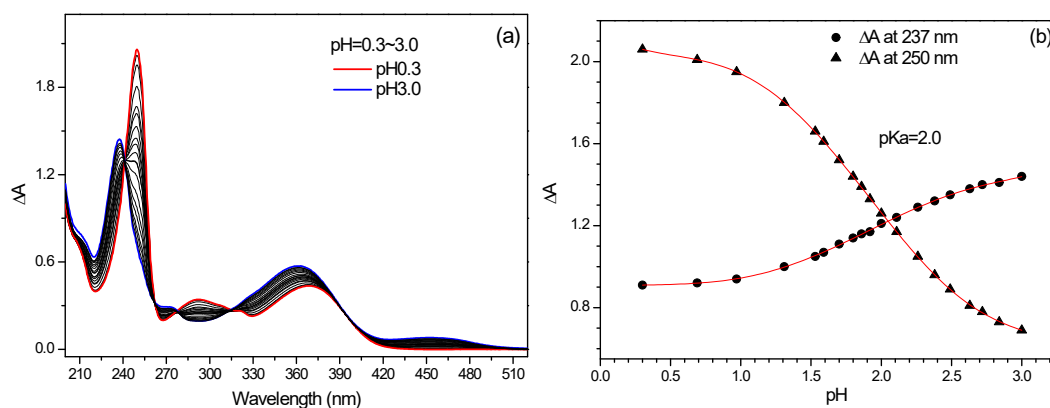

**Fig.1S** (a) UV-Vis spectra of 8-hydroxy-5-nitroquinoline in acetonitrile:water=1:1(v/v) in the presence of various concentrations of perchloric acid. (b) Measurements of  $pK_a$  for HO-QN-NO<sub>2</sub> in acetonitrile:water=1:1(v/v) solution.

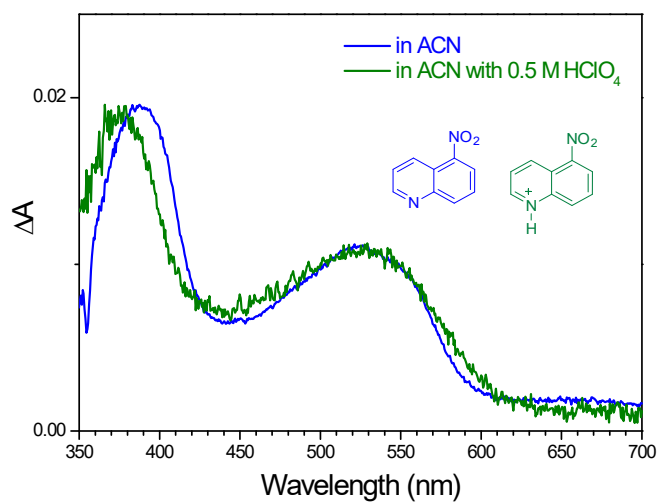

**Fig.2S** TA spectra recorded at 0 ns after 355 nm laser excitation of 5-nitroquinoline in acetonitrile under argon saturated conditions with 0.5 M HClO<sub>4</sub> and without acid present. These spectra are assigned to the neutral and protonated triplets, respectively.

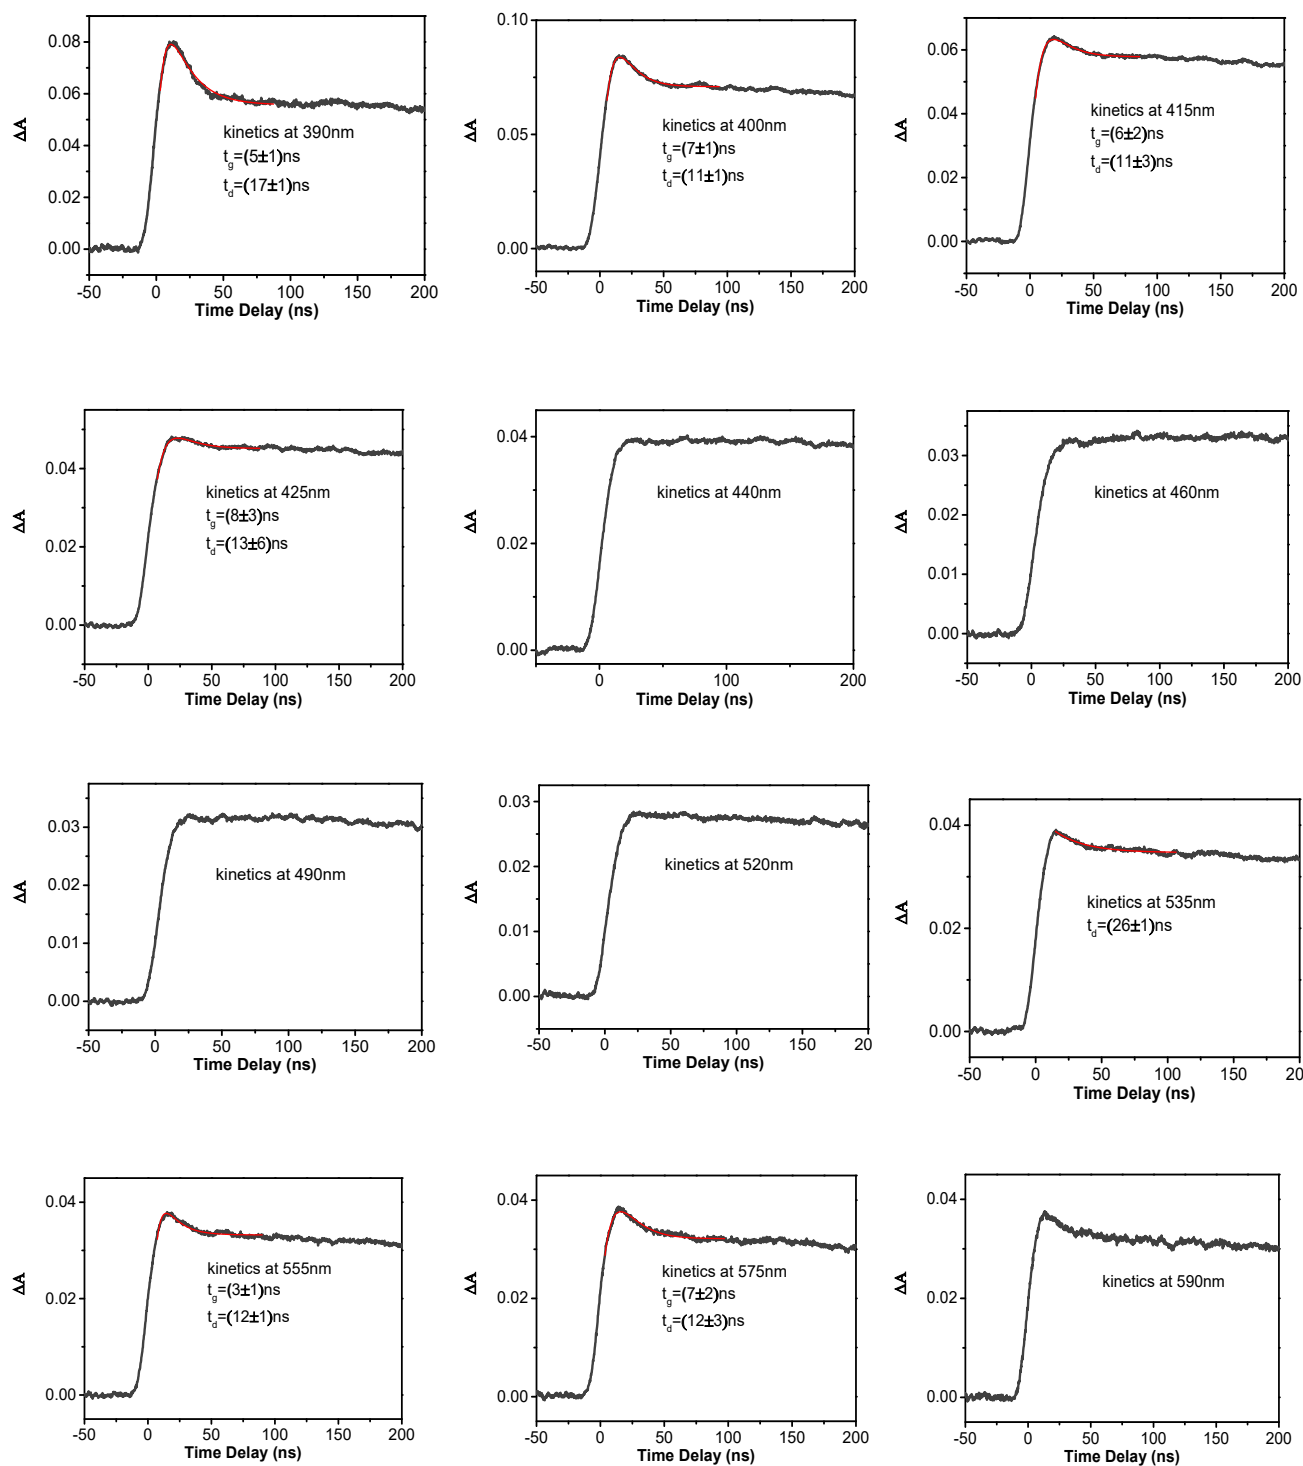

**Fig.3S** Plot of kinetics data at wavelengths 390–590 nm. The data were collected immediately after 355 nm laser excitation of 8-hydroxyquinoline in argon saturated acetonitrile.

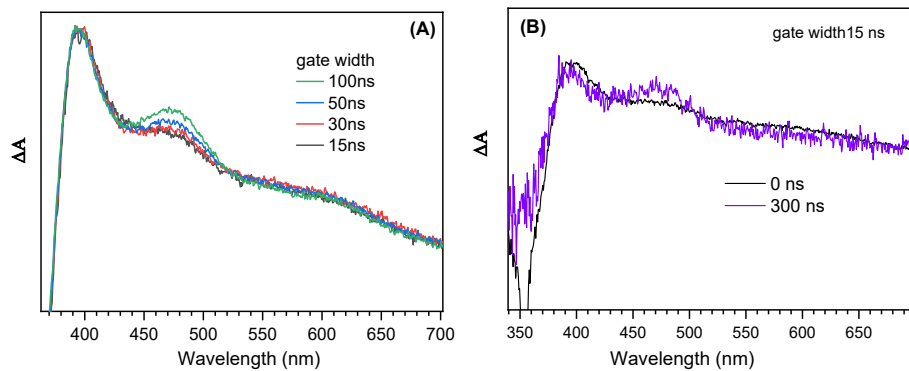

**Fig.4S** Normalized nanosecond TA spectra recorded in acetonitrile under air condition (A) immediately (0 ns) after the laser excitation with different gate width setups, and (B) with gate width of 15 ns.

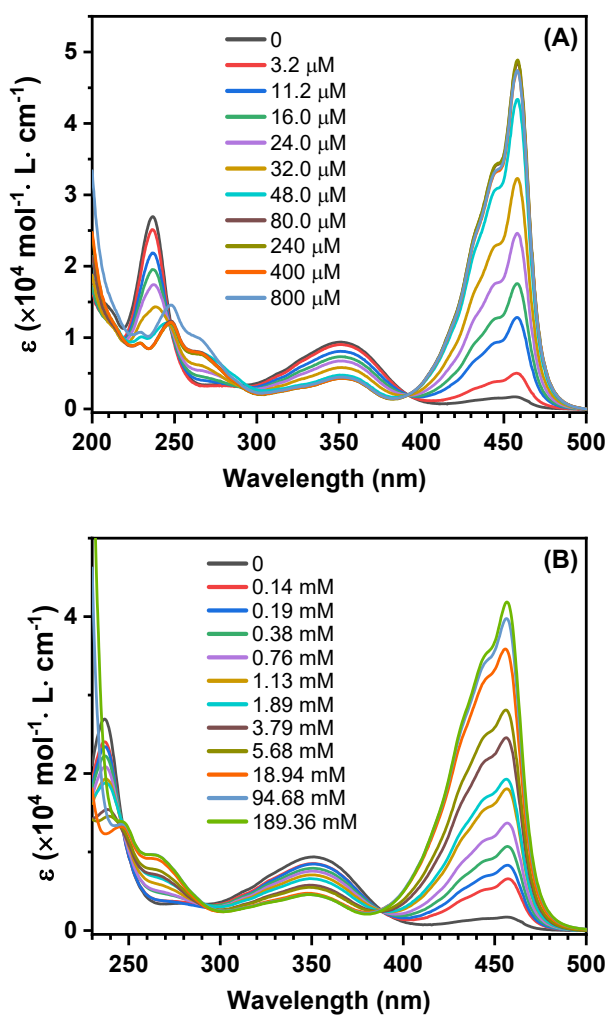

**Fig.5S** UV-Vis absorption spectra of 8-hydroxy-5-nitroquinoline in acetonitrile in the presence of various concentrations of (A) tetra-butylammonium hydroxide and (B) *t*-butylamine.

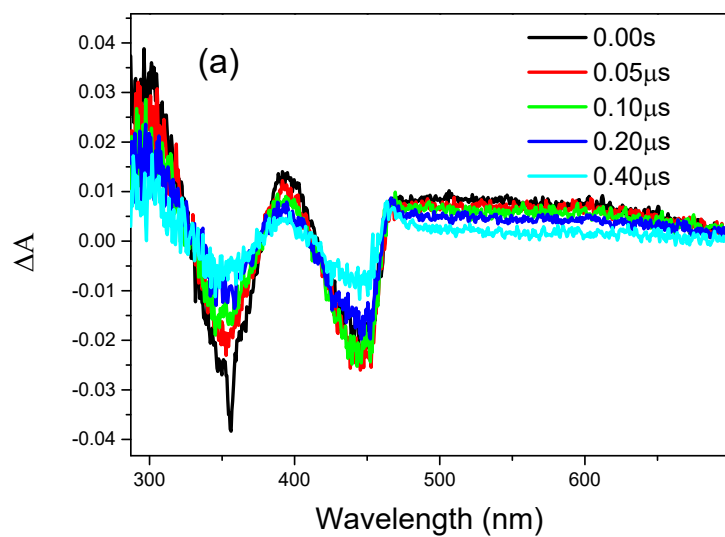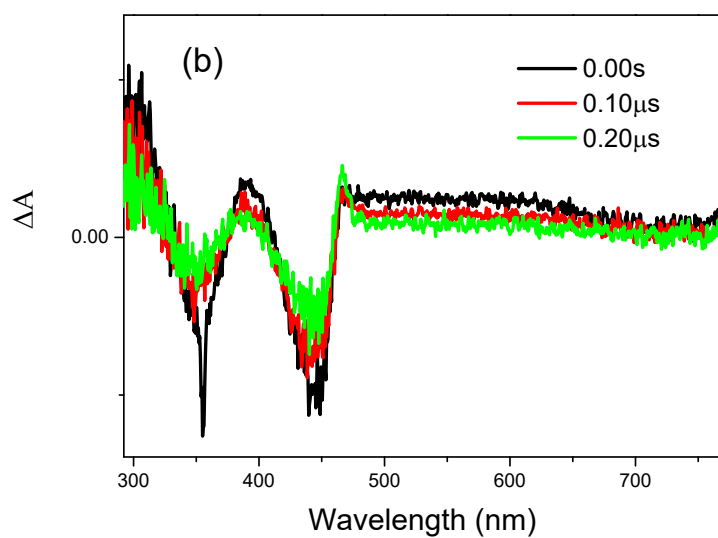

**Fig.6S** Nanosecond TA spectra after excitation of 8-hydroxy-5-nitroquinoline under argon condition in acetonitrile solution containing (a) 3.79 mM TBA and (b) 5.68 mM TBA.

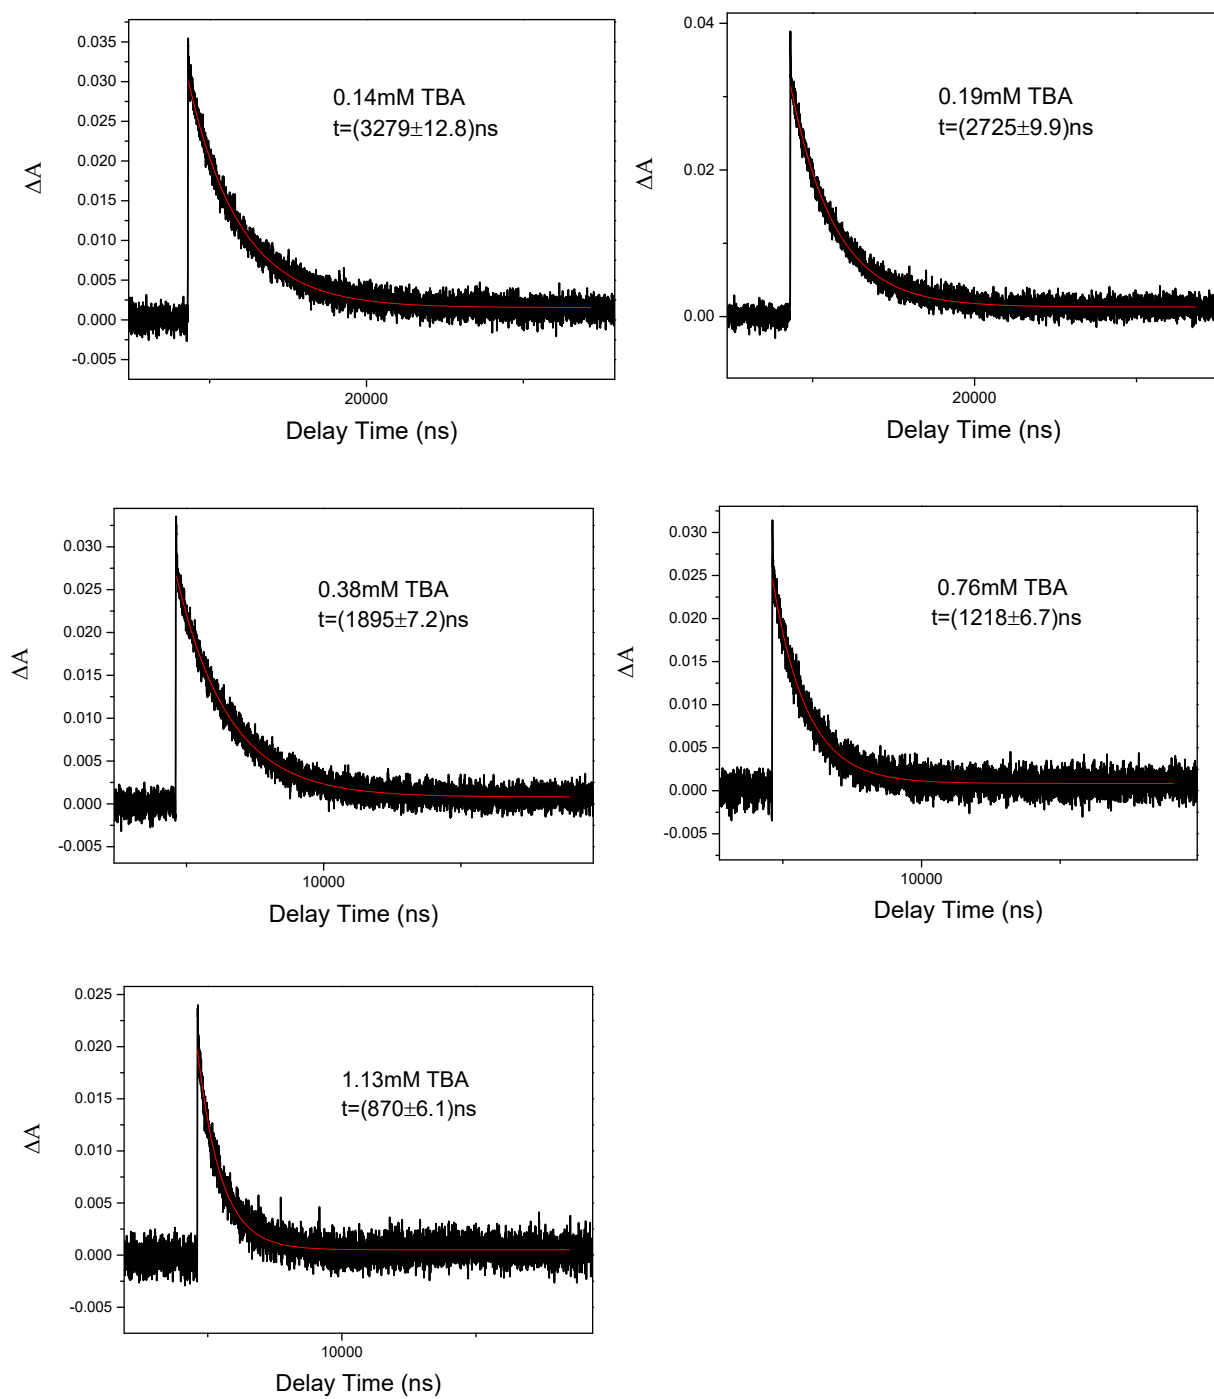

**Fig.7S** Fitting mono-exponential functions to the kinetics of 8-hydroxy-5-nitroquinoline under argon condition at 400 nm obtained in acetonitrile containing various concentrations of TBA.

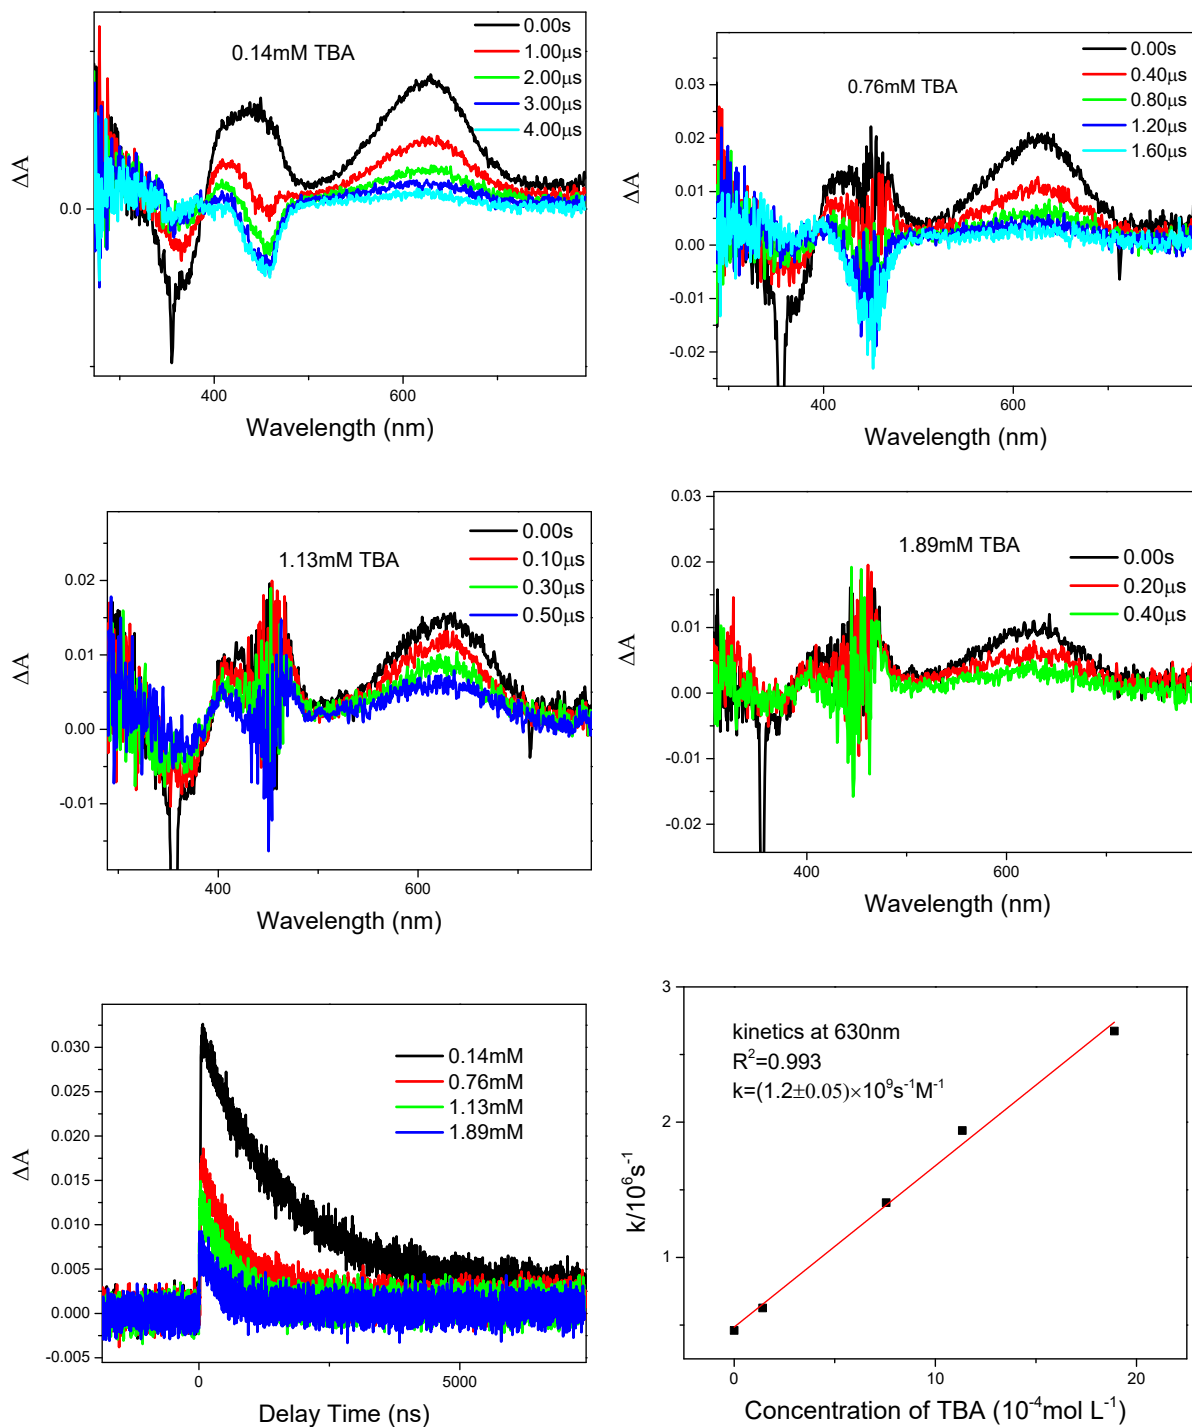

**Fig.8S** Nanosecond TA spectra and kinetic data at 630 nm obtained after excitation of 4-nitro-1-naphthol under argon condition in acetonitrile solution containing various concentrations of TBA.



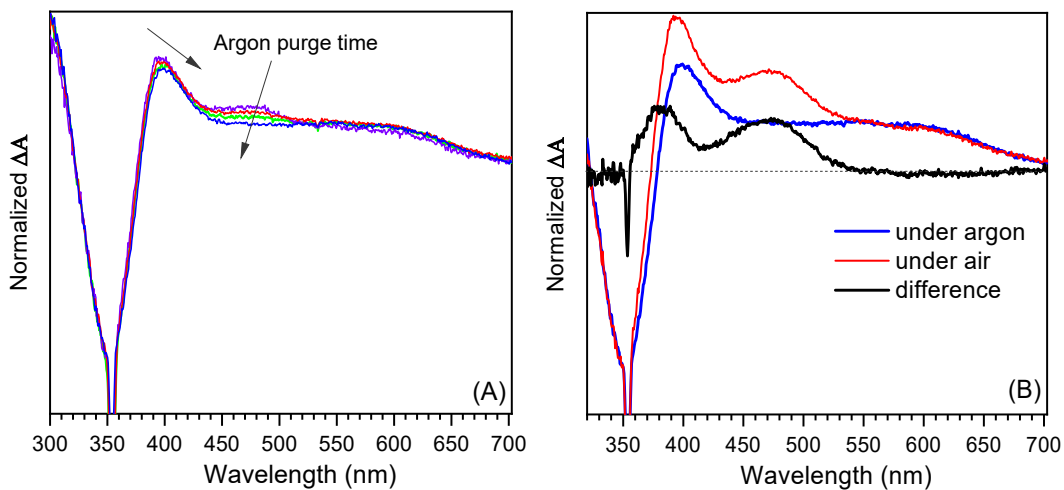

**Fig.9S** (A) Nanosecond TA spectra recorded at 0 ns in acetonitrile with varying argon purged time and (B) Nanosecond TA spectra recorded at 0 ns in acetonitrile under argon and air conditions. The spectra were normalized using the ground state bleaching. The difference spectrum is obtained by subtracting spectrum under argon from the one under air by removing the ground state bleaching.

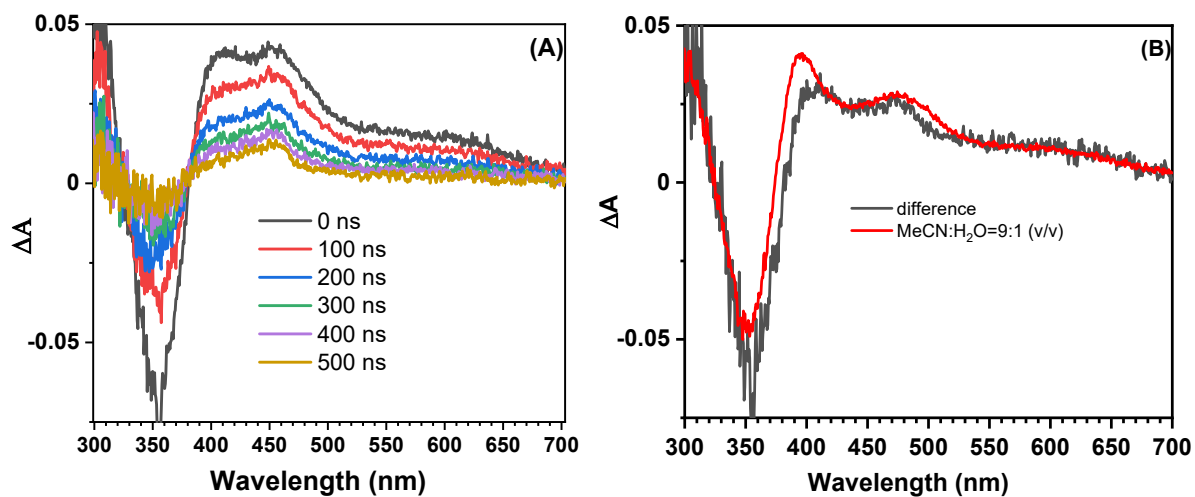

**Fig.10S** (A) Nanosecond TA spectra recorded after excitation of 8-hydroxy-5-nitroquinoline under air condition in MeCN:H<sub>2</sub>O=9:1 (v/v). (B) A comparison of the TA spectrum recorded at 0 ns under air condition in MeCN:H<sub>2</sub>O=9:1 (v/v) to the difference spectrum by subtracting the scaled 500 ns spectrum from the 0 ns spectrum in graph A.

The two spectra in graph B appear to agree in the region of 430-500 nm, indicating that  $T_1$  state NO<sub>2</sub>-QN-O<sup>-</sup> is generated in MeCN:H<sub>2</sub>O=9:1 (v/v) mixed solution.

**Table 1S** Tentative vibrational assignments for T<sub>1</sub> state of NO<sub>2</sub>-QN-O<sup>-</sup> in ACN.

| Mode            | Calculation      |            |                | Experimental frequency (cm-1) |              | Assignment (PED%)                                                                                                                                                                                                                                                                             |
|-----------------|------------------|------------|----------------|-------------------------------|--------------|-----------------------------------------------------------------------------------------------------------------------------------------------------------------------------------------------------------------------------------------------------------------------------------------------|
|                 | Frequency (cm-1) |            | Raman activity | 435 nm probe                  | 266 nm probe |                                                                                                                                                                                                                                                                                               |
|                 | Original         | Calibrated |                |                               |              |                                                                                                                                                                                                                                                                                               |
| v <sub>46</sub> | 1618             | 1645       | 344            | 1627                          | 1630         | vC <sub>10</sub> C <sub>8</sub> (23)+vN <sub>19</sub> C <sub>11</sub> (11)+vN <sub>19</sub> C <sub>3</sub> (15)+vC <sub>4</sub> C <sub>8</sub> (15)                                                                                                                                           |
| v <sub>45</sub> | 1580             | 1604       | 357            |                               | 1608         | vC <sub>11</sub> C <sub>10</sub> (26)+vC <sub>4</sub> C <sub>8</sub> (13)+δC <sub>3</sub> N <sub>19</sub> C <sub>11</sub> (12)                                                                                                                                                                |
| v <sub>44</sub> | 1558             | 1581       | 3487           | 1592                          | 1592         | vO <sub>15</sub> C <sub>2</sub> (68)                                                                                                                                                                                                                                                          |
| v <sub>43</sub> | 1532             | 1553       | 371            | 1555                          |              | vC <sub>1</sub> C <sub>6</sub> (37)+vC <sub>5</sub> C <sub>4</sub> (10)                                                                                                                                                                                                                       |
| v <sub>42</sub> | 1492             | 1511       | 565            | 1505                          | 1497         | vN <sub>19</sub> C <sub>3</sub> (12)+vC <sub>6</sub> C <sub>5</sub> (13)+vC <sub>4</sub> C <sub>8</sub> (10)+δH <sub>14</sub> C <sub>11</sub> N <sub>19</sub> (16)                                                                                                                            |
| v <sub>41</sub> | 1454             | 1471       | 101            | 1477                          | 1464         | vC <sub>6</sub> C <sub>5</sub> (12)+δH <sub>9</sub> C <sub>6</sub> C <sub>1</sub> (11)+δH <sub>7</sub> C <sub>1</sub> C <sub>6</sub> (19)+δH <sub>13</sub> C <sub>10</sub> C <sub>11</sub> (14)                                                                                               |
| v <sub>40</sub> | 1416             | 1430       | 115            |                               | 1431         | δH <sub>9</sub> C <sub>6</sub> C <sub>1</sub> (11)+δH <sub>12</sub> C <sub>8</sub> C <sub>10</sub> (18)+δH <sub>14</sub> C <sub>11</sub> N <sub>19</sub> (17)+<br>δN <sub>19</sub> C <sub>11</sub> C <sub>10</sub> (10)                                                                       |
| v <sub>39</sub> | 1372             | 1384       | 199            | 1386                          | 1387         | vC <sub>5</sub> C <sub>4</sub> (22)                                                                                                                                                                                                                                                           |
| v <sub>38</sub> | 1328             | 1337       | 725            |                               | 1329         | vN <sub>19</sub> C <sub>11</sub> (39)                                                                                                                                                                                                                                                         |
| v <sub>37</sub> | 1304             | 1312       | 420            |                               |              | vN <sub>19</sub> C <sub>3</sub> (10)+vO <sub>17</sub> N <sub>16</sub> (15)+vN <sub>16</sub> C <sub>5</sub> (25)                                                                                                                                                                               |
| v <sub>36</sub> | 1292             | 1299       | 368            | 1290                          | 1294         | vN <sub>19</sub> C <sub>3</sub> (33)+δH <sub>14</sub> C <sub>11</sub> N <sub>19</sub> (10)                                                                                                                                                                                                    |
| v <sub>35</sub> | 1230             | 1233       | 223            |                               | 1230         | vC <sub>2</sub> C <sub>1</sub> (20)                                                                                                                                                                                                                                                           |
| v <sub>34</sub> | 1190             | 1191       | 234            |                               |              | vC <sub>6</sub> C <sub>5</sub> (18)+δH <sub>9</sub> C <sub>6</sub> C <sub>1</sub> (22)                                                                                                                                                                                                        |
| v <sub>33</sub> | 1167             | 1167       | 1403           | 1153                          |              | vO <sub>17</sub> N <sub>16</sub> (38)+vO <sub>18</sub> N <sub>16</sub> (28)+δH <sub>7</sub> C <sub>1</sub> C <sub>6</sub> (13)                                                                                                                                                                |
| v <sub>32</sub> | 1152             | 1151       | 155            |                               | 1149         | vC <sub>10</sub> C <sub>8</sub> (16)+δH <sub>12</sub> C <sub>8</sub> C <sub>10</sub> (21)+δH <sub>13</sub> C <sub>10</sub> C <sub>11</sub> (22)                                                                                                                                               |
| v <sub>31</sub> | 1138             | 1136       | 267            |                               | 1138         | vO <sub>18</sub> N <sub>16</sub> (34)+δC <sub>3</sub> N <sub>19</sub> C <sub>11</sub> (10)+δH <sub>7</sub> C <sub>1</sub> C <sub>6</sub> (14)                                                                                                                                                 |
| v <sub>30</sub> | 1102             | 1098       | 25             |                               |              | vC <sub>1</sub> C <sub>6</sub> (11)+vC <sub>2</sub> C <sub>1</sub> (12)+δC <sub>3</sub> N <sub>19</sub> C <sub>11</sub> (14)+δH <sub>9</sub> C <sub>6</sub> C <sub>1</sub> (14)                                                                                                               |
| v <sub>29</sub> | 1065             | 1058       | 164            |                               | 1055         | vC <sub>11</sub> C <sub>10</sub> (38)                                                                                                                                                                                                                                                         |
| v <sub>28</sub> | 1010             | 1000.6     | 0.3            |                               |              | ptH <sub>12</sub> C <sub>8</sub> C <sub>10</sub> C <sub>11</sub> (25)+ptH <sub>13</sub> C <sub>10</sub> C <sub>11</sub> N <sub>19</sub> (45)+ptH <sub>14</sub> C <sub>11</sub> N <sub>19</sub> C <sub>3</sub> (16)<br>)+ptN <sub>19</sub> C <sub>11</sub> C <sub>10</sub> C <sub>8</sub> (10) |
| v <sub>27</sub> | 990              | 979        | 161            | 980                           |              | vO <sub>17</sub> N <sub>16</sub> (10)+vN <sub>16</sub> C <sub>5</sub> (12)+δC <sub>4</sub> C <sub>8</sub> C <sub>10</sub> (10)                                                                                                                                                                |

a: B3LYP/6-311+G(d,p) calculated frequency; b: Calibration equation:  $y=1.06x-70$ ;

v:stretch; δ: in-plane bending; pt:torsion; PED: potential energy distribution; only contributions larger than 10% were give.

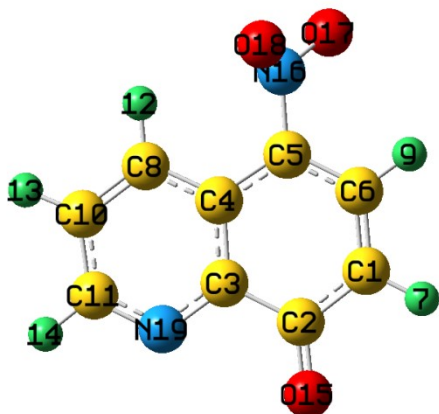

Ttransition state of transformation of NO<sub>2</sub>-QN-OH to NO<sub>2</sub>-QNH-O with the help of water in acetonitrile

SCF Done: E(RB3LYP) = -758.317300648

The imaginary frequency: -1349.06 cm<sup>-1</sup>

|   |             |             |             |
|---|-------------|-------------|-------------|
| C | -1.28717200 | -1.79036400 | 0.01081500  |
| C | -1.55521800 | -0.42399800 | 0.00262000  |
| C | -0.47751900 | 0.52164300  | 0.00137100  |
| C | 0.85645500  | 0.00523500  | -0.01308100 |
| C | 1.12273900  | -1.43285300 | -0.03227000 |
| C | 0.00398000  | -2.28208600 | -0.01099900 |
| H | -1.59739600 | 2.36904500  | 0.08568300  |
| H | -2.12168500 | -2.47736100 | 0.01639100  |
| C | -0.61163800 | 1.93560200  | 0.05836100  |
| H | 0.18124900  | -3.34989200 | -0.02393000 |
| C | 1.76777000  | 2.17014500  | 0.03301900  |
| C | 0.49586100  | 2.75004400  | 0.07240200  |
| H | 2.67264900  | 2.76624400  | 0.03617800  |
| H | 0.39475600  | 3.82617900  | 0.11517200  |
| N | 1.92221000  | 0.85808900  | -0.00256700 |
| O | 2.31153500  | -1.94378400 | -0.06758400 |
| H | 3.29994000  | -1.21023200 | -0.05021000 |
| N | -2.94338100 | -0.04146900 | -0.01269100 |
| O | -3.25740700 | 1.12267200  | -0.29848000 |
| O | -3.79582300 | -0.90139800 | 0.24697800  |
| O | 4.08010800  | -0.33184800 | -0.07321700 |
| H | 3.11864600  | 0.37910000  | -0.00596200 |
| H | 4.60118500  | -0.30477100 | 0.73847400  |

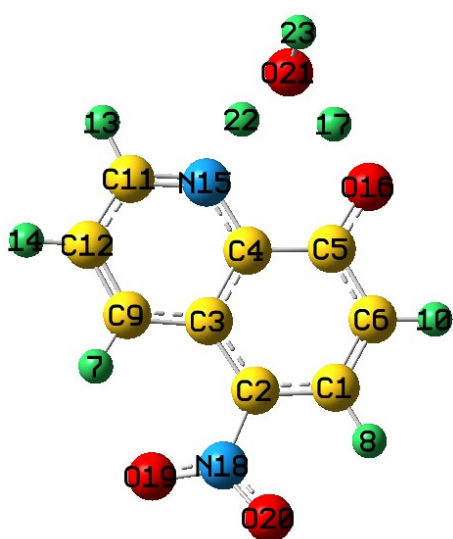

Transition state of transformation of NO<sub>2</sub>-QN-OH to NO<sub>2</sub>-QNH-O in acetontirile.

SCF Done: E(UB3LYP) = -681.762045465

The imaginary frequency: -1604.11 cm<sup>-1</sup>

|   |             |             |            |
|---|-------------|-------------|------------|
| C | 0.10222900  | -2.39336000 | 0.00000000 |
| C | -1.14990700 | -1.71718900 | 0.00000000 |
| C | -1.14689200 | -0.27877200 | 0.00000000 |
| C | 0.00000000  | 0.53833800  | 0.00000000 |
| C | 1.24703000  | -0.20715000 | 0.00000000 |
| C | 1.25633600  | -1.64951300 | 0.00000000 |
| H | 0.13943900  | -3.47541100 | 0.00000000 |
| C | -0.25244400 | 1.92115600  | 0.00000000 |
| H | 2.22125200  | -2.13121100 | 0.00000000 |
| C | -1.58152200 | 2.38212000  | 0.00000000 |
| C | -2.64336800 | 1.49041200  | 0.00000000 |
| H | 0.56689100  | 2.62070500  | 0.00000000 |
| H | -1.78235200 | 3.44489300  | 0.00000000 |
| H | -3.67639400 | 1.81345000  | 0.00000000 |
| N | -2.40876300 | 0.16645000  | 0.00000000 |
| O | -2.35654000 | -2.19631900 | 0.00000000 |
| H | -2.89501100 | -1.05598800 | 0.00000000 |
| N | 2.50011400  | 0.44694300  | 0.00000000 |
| O | 3.54310700  | -0.26491400 | 0.00000000 |
| O | 2.53817700  | 1.70792700  | 0.00000000 |

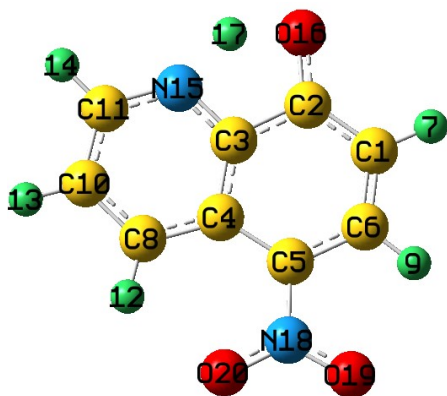

Supplement: d2cp04315g1.pdf [file d2cp04315g1.pdf]
